# Supplementary material for: Activation-induced pyroptosis contributes to the loss of MAIT cells in chronic HIV-1 infected patients
Source: PubMed Central journal article supplement (PMC9137088; doi:10.1186/s40779-022-00384-1), 2022-05-27
Supplement: 40779_2022_384_MOESM1_ESM.pdf [file 40779_2022_384_MOESM1_ESM.pdf]

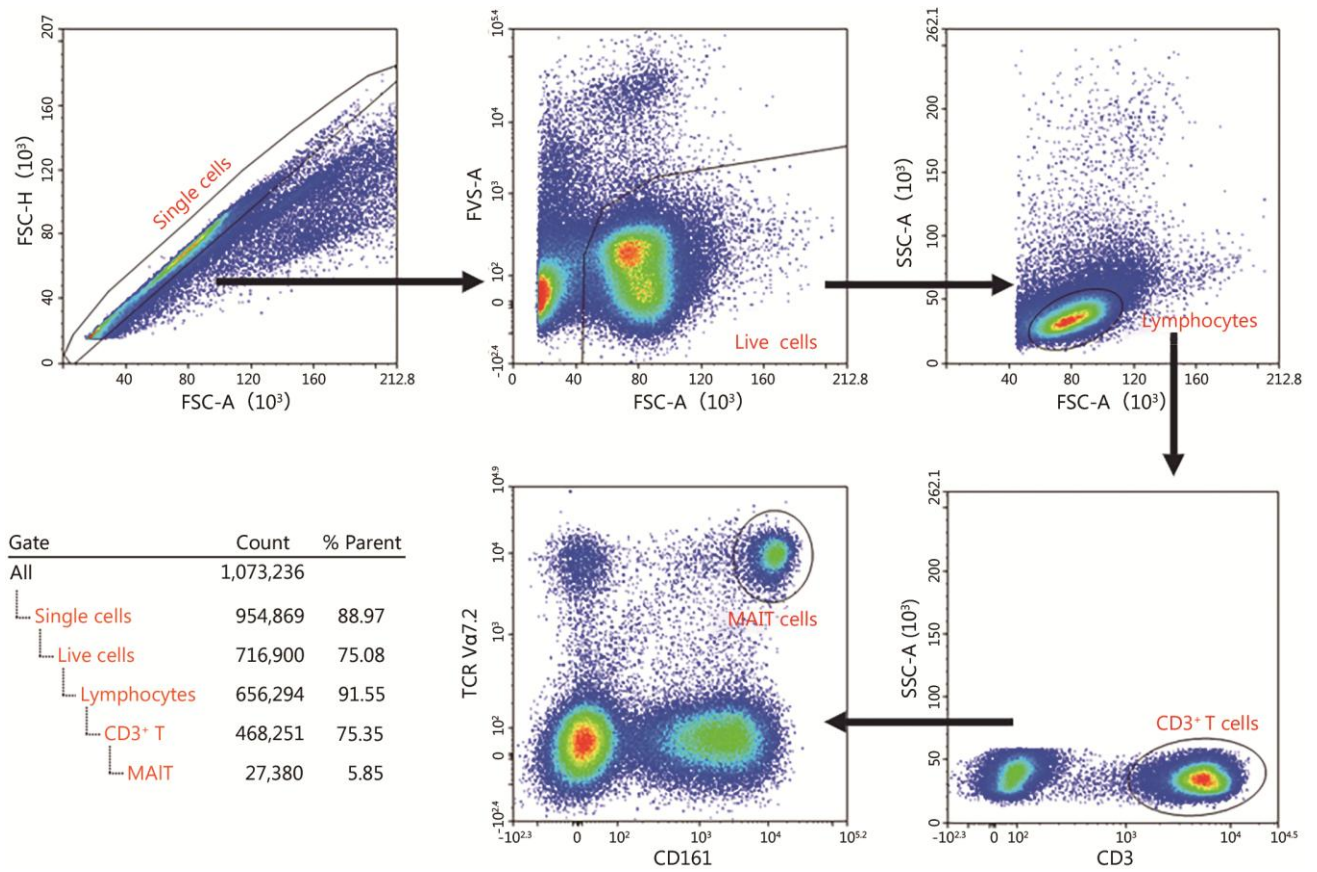

**Fig. S1** Gating strategy of mucosal-associated invariant T (MAIT) cells. MAIT cells were gated on CD3<sup>+</sup> CD161<sup>high</sup> TCR V $\alpha$ 7.2<sup>+</sup> cells. FSC-H forward scatter-height, FVS-A fixable viability stain-area, FSC-A forward scatter-area, TCR T-cell receptor, SSC-A side scatter-area

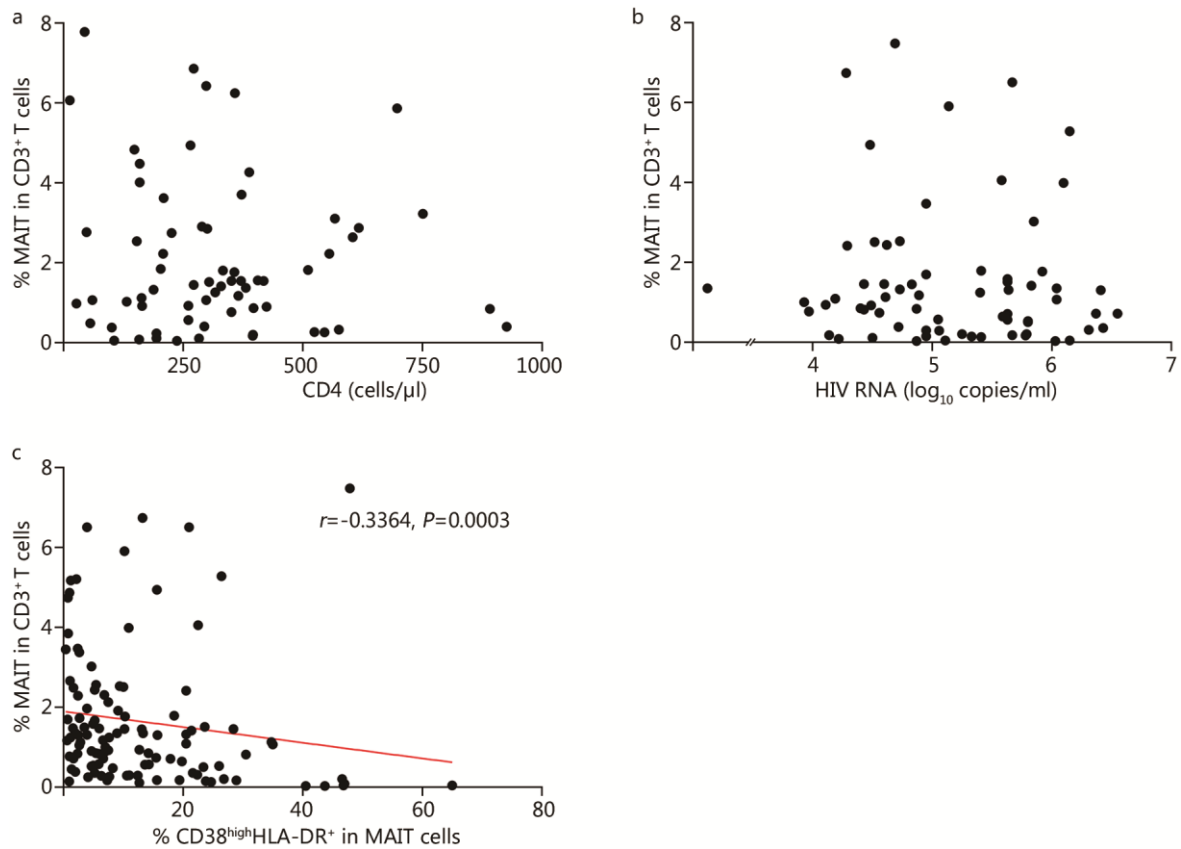

**Fig. S2** Correlation analysis of mucosal-associated invariant T (MAIT) cell frequencies with CD4<sup>+</sup> T-cell counts (a), plasma human immunodeficiency virus (HIV) viral load (b) and the frequencies of CD38<sup>high</sup>HLA-DR<sup>+</sup>-expressing MAIT cells (c). Each symbol represents a single individual. Associations were evaluated by using Spearman rank correlation test. *P*-value and Spearman's Rho value are shown



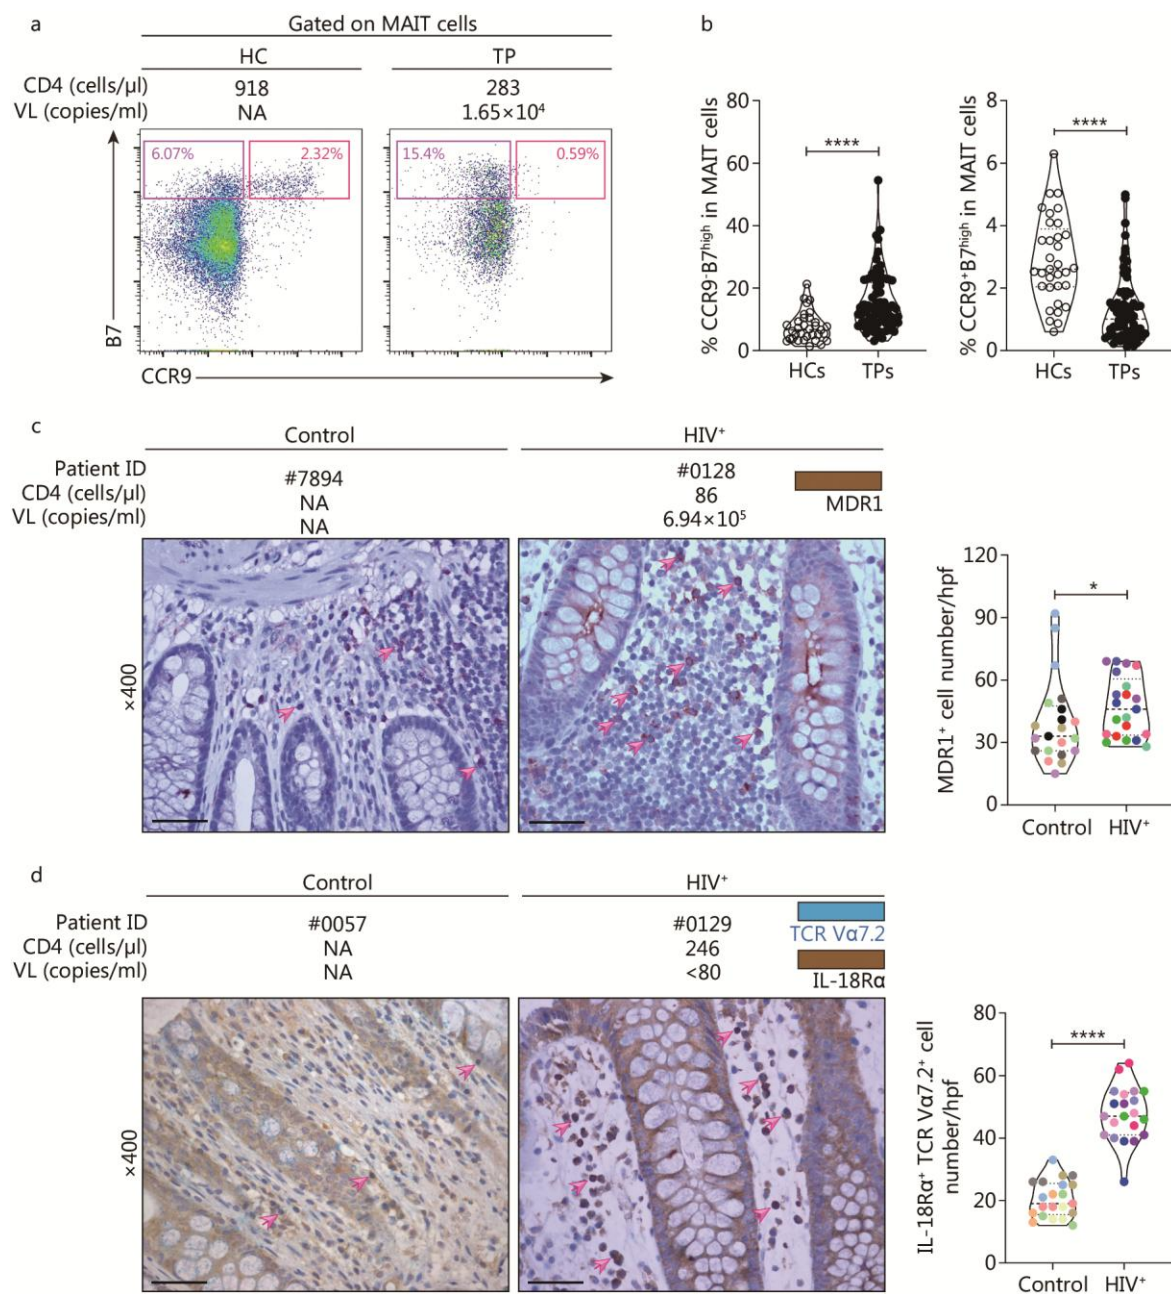

**Fig. S4** Increased mucosal-associated invariant T (MAIT) cells in colorectal mucosa tissues from human immunodeficiency virus type 1 (HIV-1) infected patients. **a** Representative FACS plots from one HC and one TP displaying CCR9 and integrin  $\beta 7$  expression. **b** Pooled data showing the frequencies of CCR9<sup>-</sup>integrin  $\beta 7^{\text{high}}$  and CCR9<sup>+</sup>integrin  $\beta 7^{\text{high}}$  MAIT cells from HCs (hollow circles,  $n = 33$ ) and TPs (solid circles, total  $n = 69$ ). **c** Representative immunohistochemistry images ( $\times 400$ ) and quantification of MAIT cells in colorectal mucosa tissues from HIV-negative controls ( $n = 7$ ) and HIV<sup>+</sup> patients ( $n = 7$ ) single-stained with anti-MDR1. Arrowheads highlight canonical MDR1 only positive cells. **d** Representative immunohistochemistry images ( $\times 400$ ) and quantification of MAIT cells in colorectal mucosa tissues from HIV-negative ( $n = 7$ ) and HIV<sup>+</sup> patients ( $n = 7$ )

co-stained with anti-IL-18R $\alpha$  and anti-TCR V $\alpha$ 7.2. Arrowheads highlight canonical IL-18R $\alpha$ <sup>+</sup>TCR V $\alpha$ 7.2<sup>+</sup> double-positive cells. Each color in the pooled data (**c** and **d**) of immune single or double stains represents one single subject, and each dot represents single or double-positive cell numbers counted in a single high-power field (hpf,  $\times$ 400). Each symbol represents a single individual. Data are expressed as  $M (Q_1, Q_3)$ . \* $P < 0.05$ , \*\*\*\* $P < 0.0001$ . Scale bar of hpf = 50  $\mu$ m. Mann-Whitney  $U$  test (**b-d**). HC healthy control, TP treatment-naïve patient, VL viral load, NA not available, CCR9 C-C motif chemokine receptor 9, HIV human immunodeficiency virus, IL-18 interleukin-18, TCR T-cell receptor
