# Supplementary material for: Activation-induced pyroptosis contributes to the loss of MAIT cells in chronic HIV-1 infected patients
Source: PubMed Central journal article supplement (PMC9137088; doi:10.1186/s40779-022-00384-1), 2022-05-27
Supplement: 40779_2022_384_MOESM2_ESM.pdf [file 40779_2022_384_MOESM2_ESM.pdf]

**Table S1** Antibodies for flow cytometry

| Markers            | Clones   | Fluorochromes                      | Cat. No. | Companies           |
|--------------------|----------|------------------------------------|----------|---------------------|
| CD3                | OKT3     | Brilliant Violet 510 <sup>TM</sup> | 317332   | Biolegend, USA      |
| CD3                | SK7      | APC/Cy7                            | 557832   | Biolegend, USA      |
| CD4                | SK3      | PerCP                              | 247234   | BD Biosciences, USA |
| CD161              | HP-3G10  | PE                                 | 339904   | Biolegend, USA      |
| TCR V $\alpha$ 7.2 | 3C10     | Brilliant Violet 421 <sup>TM</sup> | 351716   | Biolegend, USA      |
| CD38               | HIT2     | APC                                | 555462   | BD Biosciences, USA |
| HLA-DR             | L243     | PerCP                              | 347364   | BD Biosciences, USA |
| PD-1               | EH12.2H7 | PE                                 | 329906   | Biolegend, USA      |
| IFN- $\gamma$      | 4S.B3    | PE/Cy7                             | 557844   | BD Biosciences, USA |
| TNF- $\alpha$      | MAb11    | FITC                               | 502912   | Biolegend, USA      |
| CCR9               | L053EB   | PE/Cy7                             | 358910   | Biolegend, USA      |
| Integrin B7        | FIB504   | APC                                | 555943   | BD Biosciences, USA |

*TCR* T-cell receptor, *HLA* human leukocyte antigen, *PD-1* programmed death-1, *IFN- $\gamma$*  interferon- $\gamma$ , *TNF- $\alpha$*  tumor necrosis factor- $\alpha$ , *CCR9* C-C motif chemokine receptor 9

**Table S2** Antibodies for immunohistochemistry

| Names                               | Clones      | Cat. No. | Dilution | Companies        |
|-------------------------------------|-------------|----------|----------|------------------|
| Rabbit anti-human MDR1              | EPR10364-57 | ab170904 | 1:100    | Abcam, UK        |
| Goat anti-human IL-18R $\alpha$     | Polyclonal  | AF840    | 1:250    | R&D systems, USA |
| Mouse anti-human TCR V $\alpha$ 7.2 | 3C10        | 351702   | 1:500    | Biolegend, USA   |
| Mouse anti-human CD4                | UMAB64      | ZM-0418  | 1:500    | Origene, USA     |

*MDR1* multi-drug resistance protein 1, *IL-18* interleukin-18, *TCR* T-cell receptor

**Table S3** Characteristics of enrolled HIV-1 infected patients in single-cell RNA sequencing

| HIV status/Patient ID                          | Gender | Age (years) | CD4 <sup>+</sup> T cell count<br>(cells/ $\mu$ l) | CD8 <sup>+</sup> T cell count<br>(cells/ $\mu$ l) | Plasma viral load<br>(copies/ml) | cART regimen |
|------------------------------------------------|--------|-------------|---------------------------------------------------|---------------------------------------------------|----------------------------------|--------------|
| HCs ( $n = 4$ )                                |        |             |                                                   |                                                   |                                  |              |
| HC01                                           | Male   | 27          | 1134                                              | 940                                               | NA                               | NA           |
| HC02                                           | Male   | 31          | 525                                               | 352                                               | NA                               | NA           |
| HC03                                           | Male   | 27          | 816                                               | 634                                               | NA                               | NA           |
| HC04                                           | Male   | 28          | 822                                               | 621                                               | NA                               | NA           |
| EC ( $n = 1$ )                                 |        |             |                                                   |                                                   |                                  |              |
| EC01                                           | Male   | 26          | 627                                               | 822                                               | NA                               | NA           |
| TPs ( $n = 9$ )                                |        |             |                                                   |                                                   |                                  |              |
| CD4 <sup>high</sup> (CD4 $\geq$ 350, $n = 3$ ) |        |             |                                                   |                                                   |                                  |              |
| TP-H01                                         | Male   | 30          | 448                                               | 935                                               | 13,200                           | NA           |
| TP-H02                                         | Male   | 40          | 383                                               | 1659                                              | 280,000                          | NA           |
| TP-H03                                         | Male   | 23          | 541                                               | 874                                               | 47,200                           | NA           |
| CD4 <sup>low</sup> (CD4 < 350, $n = 6$ )       |        |             |                                                   |                                                   |                                  |              |
| TP-L01                                         | Male   | 21          | 302                                               | 1450                                              | 32,200                           | NA           |
| TP-L02                                         | Male   | 25          | 266                                               | 1049                                              | 13,500                           | NA           |
| TP-L03                                         | Male   | 26          | 348                                               | 1352                                              | 32,700                           | NA           |

|                                        |      |    |     |      |          |             |
|----------------------------------------|------|----|-----|------|----------|-------------|
| TP-L04                                 | Male | 23 | 176 | 661  | 126,000  | NA          |
| TP-L05                                 | Male | 43 | 289 | 854  | 190,000  | NA          |
| TP-L06                                 | Male | 30 | 198 | 998  | 1230,000 | NA          |
| ARTs (cART-treated patients, $n = 5$ ) |      |    |     |      |          |             |
| ART01                                  | Male | 24 | 457 | 604  | < LOD    | 3TC/EFV/TDF |
| ART02                                  | Male | 29 | 459 | 618  | < LOD    | 3TC/AZT/NVP |
| ART03                                  | Male | 32 | 311 | 460  | < LOD    | 3TC/EFV/TDF |
| ART04                                  | Male | 30 | 627 | 746  | < LOD    | 3TC/EFV/TDF |
| ART05                                  | Male | 25 | 459 | 1047 | < LOD    | 3TC/EFV/TDF |

*HIV* human immunodeficiency virus, *cART* combined antiretroviral therapy, *HCS* healthy controls, *NA* not applicable, *EC* elite controller, *TPs* treatment-naïve patients, *ART* antiretroviral therapy, <*LOD* below the limit of detection of 80 copies/ml, *3TC* lamivudine, *EFV* efavirenz, *TDF* tenofovir disoproxil, *AZT* azidothymidine, *NVP* nevirapine
